# Supplementary material for: Enhanced HSP70 lysine methylation promotes proliferation of cancer cells through activation of Aurora kinase B
Source: PubMed Central journal article supplement — Nat Commun. 2012 Sep 18;3:1072–. doi: 10.1038/ncomms2074 (PMC3658001; doi:10.1038/ncomms2074), 2012-09-18
Supplement: ncomms2074-s1.pdf [file ncomms2074-s1.pdf]

**a**

|                              |                                                      |
|------------------------------|------------------------------------------------------|
| <i>Human HSP70</i>           | ALESYAFNMKSAVED-EGLK <b>GK</b> ISEADKKKVLDKCQEVISML  |
| <i>Human HSC70</i>           | SLESYAFNMKATVED-EKLQ <b>GK</b> INDEDKQKILDKCNEIINML  |
| <i>Human BIP</i>             | ELESYAYSLKNQIGDKEKLG <b>GK</b> LSSSEDKETMEKAVEEKIEML |
| <i>Mus musculus</i>          | ALESYAFNMKSAVEDEGLK <b>GK</b> LSEADKKKVLDKCQEV       |
| <i>Drosophila auraria</i>    | ALESYVFNVKQAVEQAG--AG <b>KL</b> DEADKNSVLEKCNET      |
| <i>S. Cerevisiae Ssa1</i>    | QLESIAYSLKNTIS---EAGD <b>KL</b> EQADKDTVTKKAETISML   |
| <i>S. Pombe SPAC13G7.02c</i> | HLESYAYSLRNSLDD--PNLKD <b>KV</b> DASDKEAIDKAVKETIEML |
| <i>E.Coli DnaK</i>           | QGDHLLHSTRKQVEE---AGD <b>KL</b> PADDKTAIESALTALETAL  |

**b**

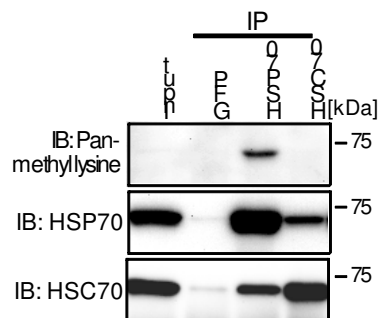

**Supplementary Figure S1 | Amino acid sequence alignment of HSP70.**

**a**, Lys 561 is conserved across various species, including *Homo sapiens*, *Mus musculus* and *Drosophila auraria*. **b**, MCF7 cells were lysed with RIPA buffer and whole cell extracts were immunoprecipitated with anti-GFP, anti-HSP70 (clone# C92F3A-5, MBL) and anti-HSC70 (clone# 1B5, MBL) antibodies. After denatured immunoprecipitants with sample buffer, samples were fractionated by SDS-PAGE and immunoblotted with anti-pan-methyllysine, anti-HSP70 and anti-HSC70 antibodies.

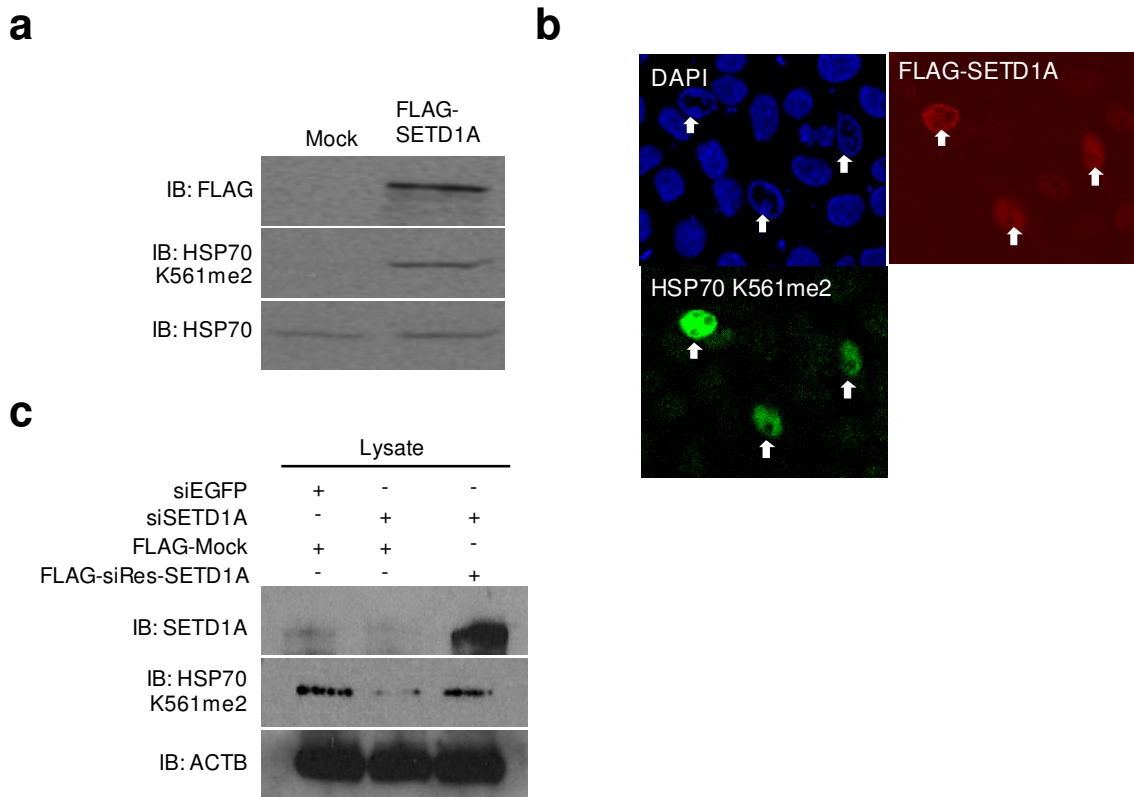

**Supplementary Figure S2 | Methylation of HSP70 by SETD1A.**

**a**, COS7 cells were transfected with FLAG-tagged SETD1A (FLAG-SETD1A) and mock (negative control) vectors. Immunoblot analysis was conducted with anti-FLAG, anti-HSP70K561me2 and anti-HSP70 antibodies, respectively. **b**, Immunocytochemical analysis of K561 di-methylation of HSP70. After transfection of COS7 cells with FLAG-SETD1A, immunocytochemical analysis was performed. The cells were stained with an anti-HSP70K561me2 antibody (Alexa 488, green), an anti-FLAG antibody (Alexa 594, red) and DAPI (blue). Scale bar; 20  $\mu$ m. **c**, Either a FLAG-Mock or a FLAG-siRes-SETD1A expression vector was transfected into HeLa cells treated with siEGFP or siSETD1A for 24 h. The cells were collected 24 h after transfection, and cell lysates were immunoblotted with anti-HSP70K561me2, anti-SETD1A and anti-ACTB antibodies.

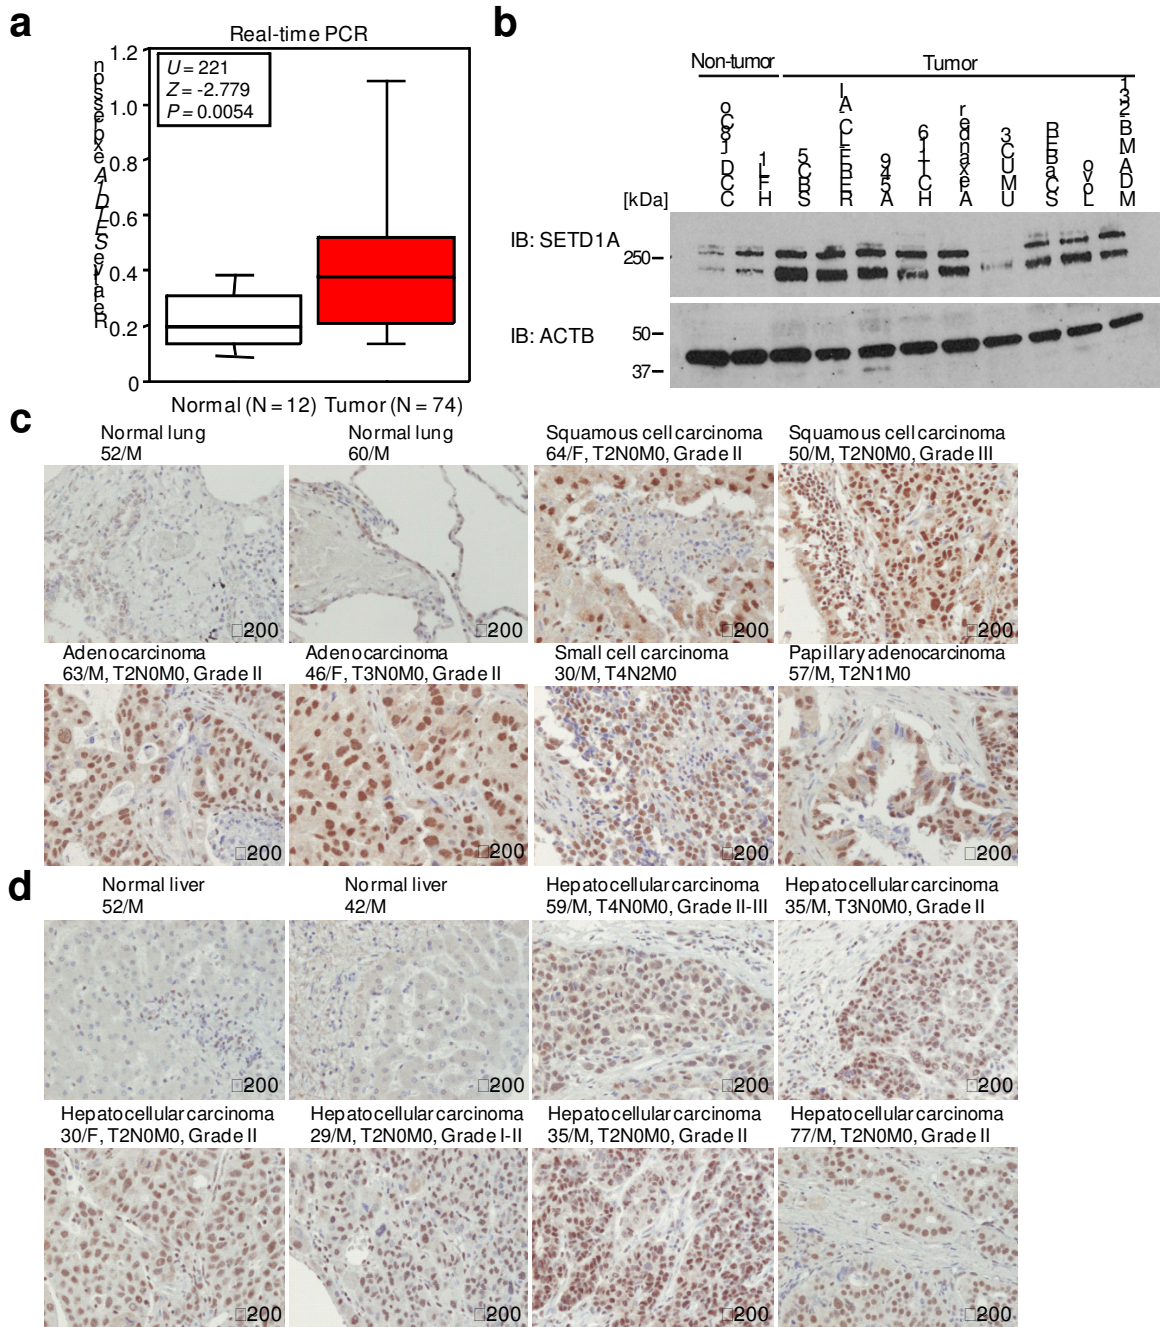

**Supplementary Figure S3 | SETD1A is overexpressed in human cancer cells.**

**a**, Expression analysis of *SETD1A* at mRNA levels in 74 bladder cancer cases and 12 normal bladder cases by qRT-PCR, and results are shown by box-whisker plot. *GAPDH* and *SDH* were used as housekeeping genes. The Mann-Whitney *U*-test was used for statistical analysis ( $P = 0.0054$ ). **b**, Expression levels of SETD1A in two non-tumor cell lines (CCD-18Co and HFL1) and nine tumor cell lines (SBC5, RERF-LC-AI, A549, HCT116, Alexander, UMC3, SCABER, LoVo and MDA-MB-231). Cell lysates were immunoblotted with an anti-SETD1A antibody (NB100-558, Novus Biologicals). ACTB expression served as an internal control of each sample. **c**, **d**, Immunohistochemical staining of SETD1A in lung (**c**) and liver (**d**) tissues. Clinical information for each section is represented above histological pictures. Tissue samples were purchased from BioChain. Original magnification, x200.

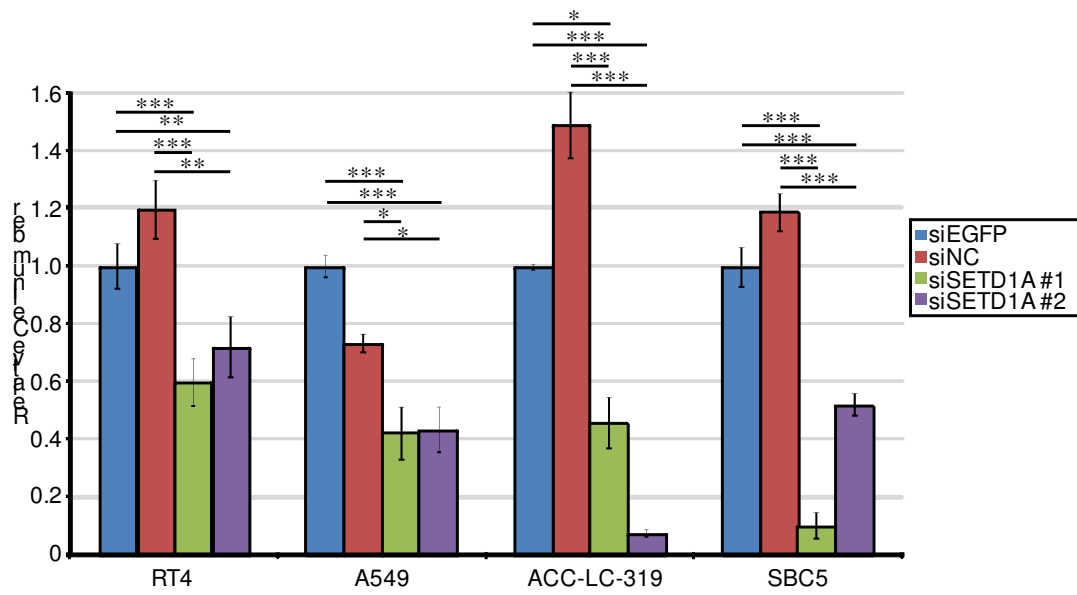

**Supplementary Figure S4 | SETD1A is important for the growth regulation of cancer cells.**

Effects of *SETD1A* siRNA knockdown on the viability of bladder (RT4) and lung (A549, ACC-LC-319 and SBC5) cancer cell lines. Relative cell numbers were normalized to the number of siEGFP-treated cells (siEGFP = 1): results are the mean  $\pm$ SD of three independent experiments. *P* values were calculated using Student's *t*-test (\*,  $P < 0.05$ ; \*\*,  $P < 0.01$ ; \*\*\*,  $P < 0.001$ ).

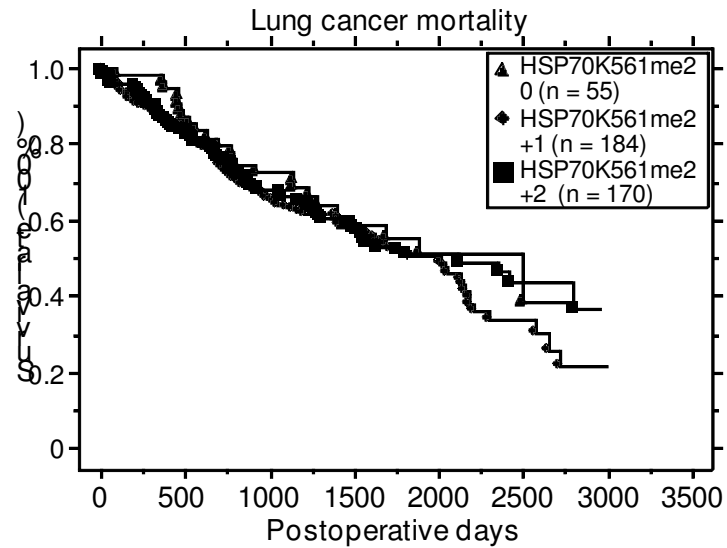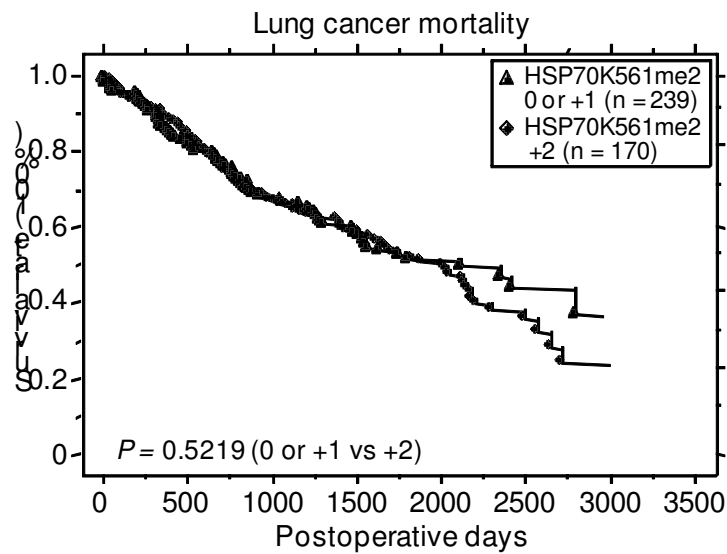

**Supplementary Figure S5 | No correlation between HSP70 methylation status and the prognosis of lung cancer.**

Kaplan-Meier estimates of overall survival time of patients with non-small cell lung cancer (NSCLC). *P*-value was calculated using log-rank test.

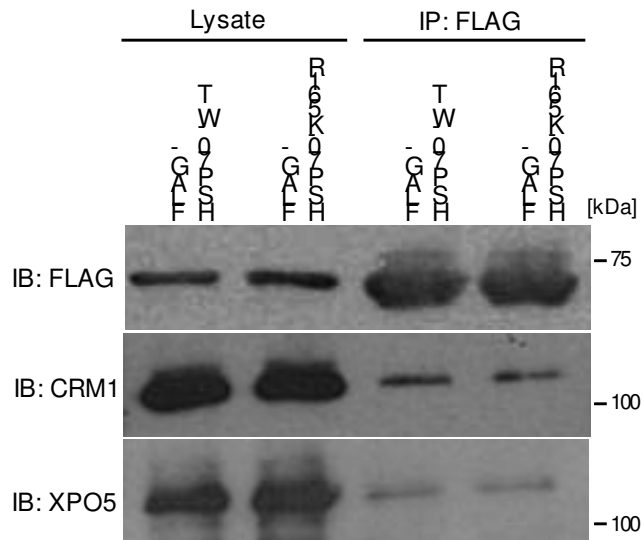

**Supplementary Figure S6 | Lys 561 di-methylation of HSP70 does not affect its interactions with CRM1 and XPO5 proteins.**

293T cells were transfected with HSP70-WT and HSP70-K561R, respectively. After immunoprecipitation using anti-FLAG M2 agarose, immunoblot analysis was performed with anti-FLAG, anti-CRM1 and anti-XPO5 antibodies.

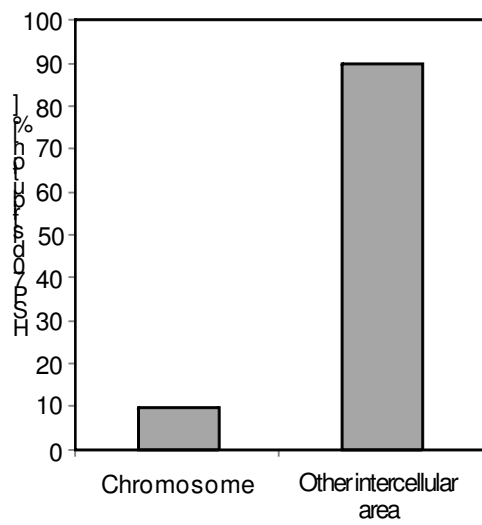

**Supplementary Figure S7 | Distribution of HSP70 protein in HeLa cells at the metaphase plate.**

Fluorescence signal intensity of HSP70 in each subcellular localization was quantitatively analyzed (Leica Microsystems). The value shows percentage ratio of HSP70 fluorescence signal intensity in chromosome or other intercellular area in comparison to that in the whole cell.

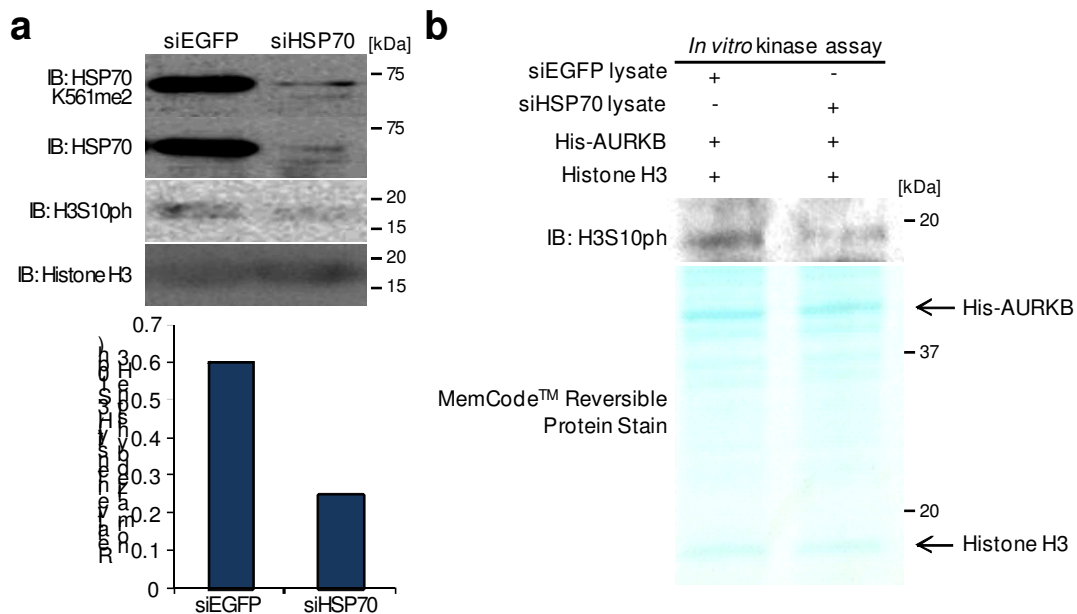

**Supplementary Figure S8 | Effect of HSP70 on AURKB kinase activity.**

**a**, Effect of HSP70 knockdown on phosphorylation of histone H3 at Ser 10. HeLa cells were synchronized using 7.5  $\mu$ g of aphidicolin for 24 h following treatment with HSP70 siRNA for 24 h. Cells were collected 12 h after release from cell cycle arrest, and immunoblot was performed with anti-HSP70 K561me2, anti-HSP70, anti-phospho-histone H3 (Ser 10) and anti-histone H3 antibodies. Signal intensity of phospho-histone H3 (Ser 10) and histone H3 was quantitatively analyzed using GS-800 calibration densitometer (BIO-RAD). Relative intensity of phospho-histone H3 (Ser 10) shows the value normalized the intensity of histone H3. **b**, HeLa cells were lysed with CellLytic™ Cell Lysis Reagent (Sigma-Aldrich) 48 h after treatment with siEGFP (control) or siHSP70. Cell lysates were mixed with His-AURKB enzyme and histone H3 substrate, in the reaction buffer (40 mM MOPS [pH7.0], 1 mM EDTA) and incubated for 10 min at 30°C, then the mixture was immunoblotted with an anti-phospho-histone H3 (Ser 10) antibody. His-AURKB and histone H3 proteins used in the reaction were visualized by MemCode™ Reversible Protein Stain (Thermo Scientific).



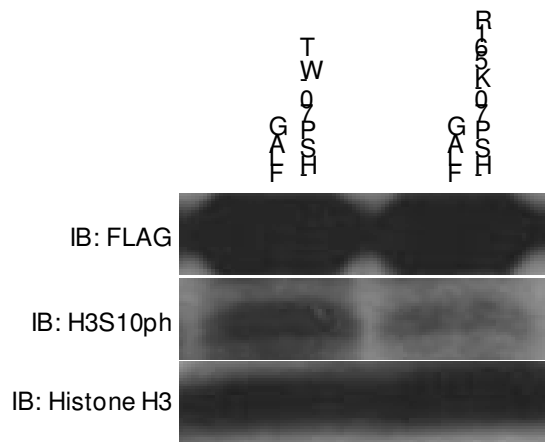

**Supplementary Figure S9 | Construction of HeLa stable cell lines overexpressing HSP70-WT and HSP70-K561R.**

Immunoblot analysis was performed with anti-FLAG, anti-phospho-H3 Ser 10 and anti-histone H3 antibodies.

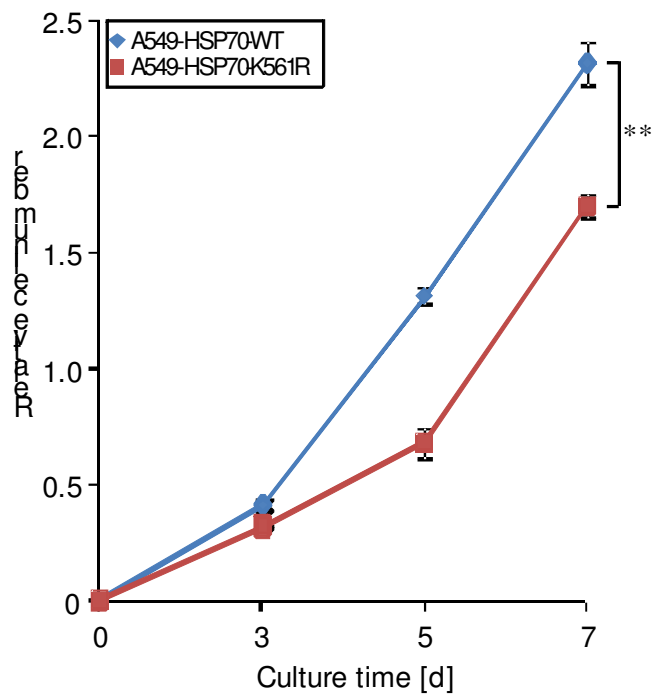

**Supplementary Figure S10 | Cell growth assay of A549 stable cell lines.**

Cell growth was measured by Cell Counting Kit-8 (Dojindo). Results are the mean  $\pm$  SD in three independent experiments. *P*-values were calculated using Student's *t*-test (\*\*, *P* < 0.01).

siHSP70 treatment  $\xrightarrow{24\text{ h}}$  pCAGGS-n3FC-HSP70 (siRNA resistant)

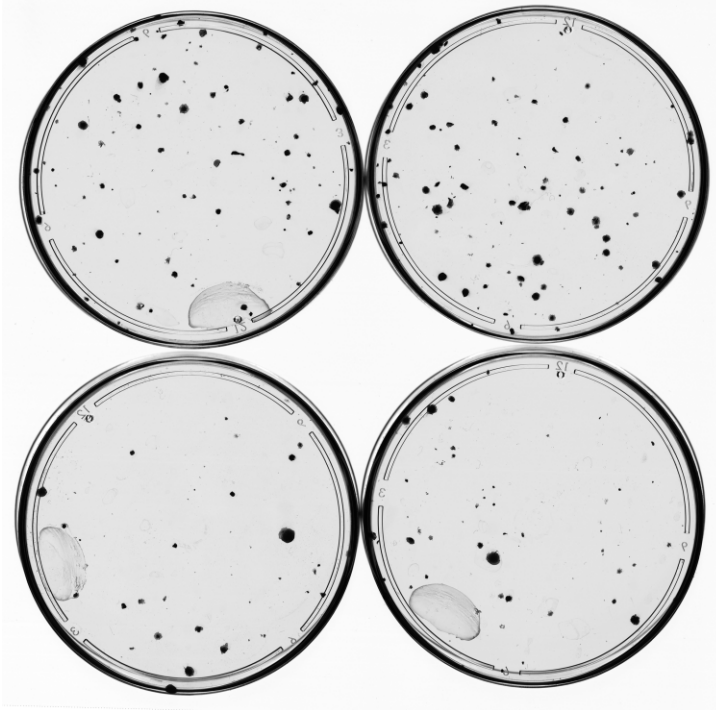

siHSP70 treatment  $\xrightarrow{24\text{ h}}$  pCAGGS-n3FC-HSP70 K561R (siRNA resistant)

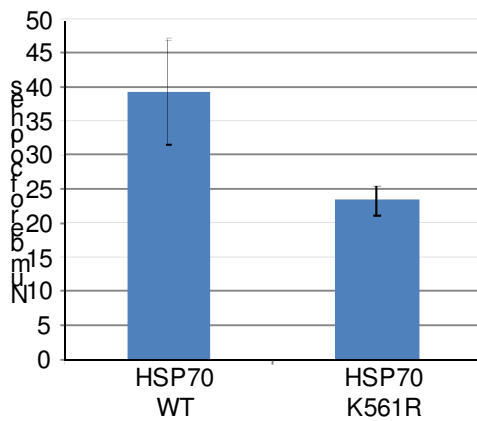

**Supplementary Figure S11 | Methylation of K561 on HSP70 promotes oncogenic activity.**

HEK293 cells were transfected with a FLAG-siRes-WT-HSP70 vector and a FLAG-siRes-K561R-HSP70 vector after treatment with siHSP70 for 24 h. The cells were cultured in a selection medium (D-MEM containing 10% FBS and 0.9 mg/ml Geneticin/G-418) for 2 weeks. Colonies were stained with Giemsa (MERCK, Whitehouse station, NJ, USA) and counted by Colony Counter software. Results are the mean  $\pm$  SD in three independent experiments.

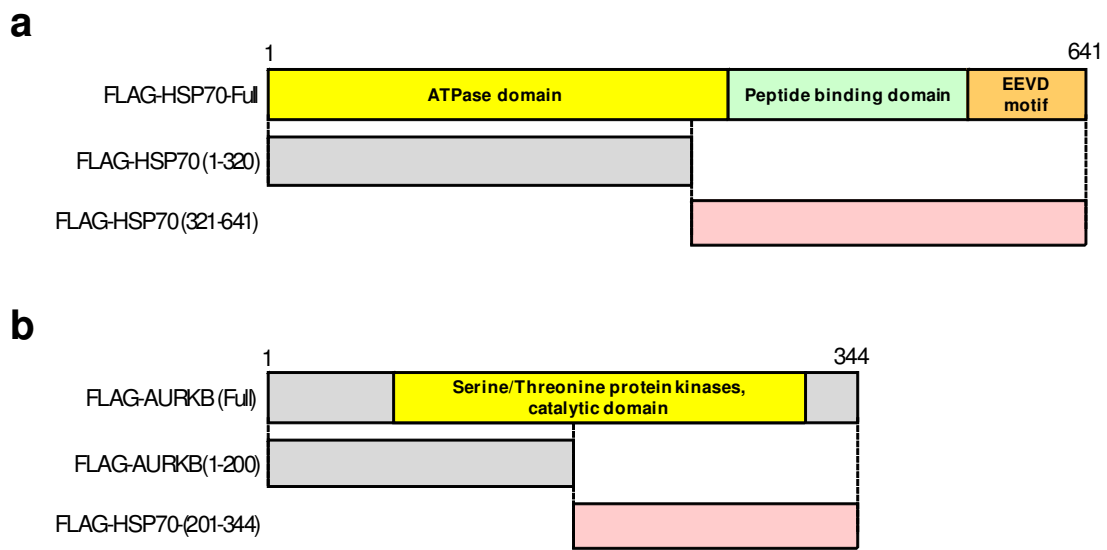

**Supplementary Figure S12 | Structure of HSP70 and AURKB constructs.**

**a**, For HSP70 functional analysis, an N-term HSP70 expression vector (1-320) and a C-term HSP70 expression vector (321-641) were constructed besides a full-length HSP70 expression vector. **b**, An N-term AURKB expression vector (1-200) and a C-term AURKB expression vector (201-344) were constructed besides a full-length AURKB expression vector to identify the binding region with HSP70.

Supplementary Table S1 | Methylated peptides

| Position | Start - End | Sequence                            | Methylation status | Ion score |
|----------|-------------|-------------------------------------|--------------------|-----------|
| K71      | 57 - 71     | NQVALNPQNTVFDA <u>K</u>             | 2                  | 39        |
| K77      | 73 - 88     | LIGR <u>K</u> FGDPVVQSDMK           | 3                  | 42        |
| K88      | 78 - 88     | FGDPVVQSDM <u>K</u>                 | 2                  | 40        |
| K112     | 103 - 112   | VQVSYKGET <u>K</u>                  | 2                  | 41        |
| K126     | 113 - 126   | AFYPEEISSMVL <u>T</u> <u>K</u>      | 2                  | 41        |
|          | 551 - 561   | SAVEDEGLKG <u>K</u>                 | 1                  | 49        |
|          | 551 - 567   | SAVEDEGLKG <u>K</u> ISEADK          | 1                  | 57        |
|          | 551 - 567   | SAVEDEGLKG <u>K</u> ISEADKK         | 2                  | 60        |
| K561     | 551 - 568   | SAVEDEGLKG <u>K</u> ISEADKK         | 1                  | 46        |
|          | 560 - 568   | G <u>K</u> ISEADKK                  | 1                  | 49        |
|          | 560 - 568   | G <u>K</u> ISEADKK                  | 2                  | 28        |
|          | 560 - 569   | G <u>K</u> ISEADKKK                 | 2                  | 28        |
| K559/561 | 551 - 567   | SAVEDEGL <u>K</u> G <u>K</u> ISEADK | 2, 1               | 35        |

**Supplementary Table S2 | Clinicopathologic characteristics of lung tissues on the tissue microarray\***

| Case number | Age | Gender | Pathology                              | Grade | Stage (TNM) | Nature     | Reactivity (Nu, density) |
|-------------|-----|--------|----------------------------------------|-------|-------------|------------|--------------------------|
| 1           | 52  | M      | Normal                                 |       |             | Normal     | Weak: 1                  |
| 2           | 47  | M      | Normal                                 |       |             | Normal     | Moderate: 2              |
| 3           | 59  | M      | Normal                                 |       |             | Normal     | Weak: 1                  |
| 4           | 60  | M      | Normal                                 |       |             | Normal     | Moderate: 1              |
| 5           | 51  | M      | Squamous cell carcinoma                | I     | T2N1M0      | Malignant  | Strong: 3                |
| 6           | 77  | M      | Squamous cell carcinoma                | I-II  | T2N0M0      | Malignant  | Moderate: 2              |
| 7           | 51  | M      | Squamous cell carcinoma                | II    | T2N0M0      | Malignant  | Strong: 3                |
| 8           | 72  | M      | Squamous cell carcinoma                | II    | T1N0M0      | Malignant  | Moderate: 2              |
| 9           | 64  | F      | Squamous cell carcinoma                | II    | T2N0M0      | Malignant  | Moderate: 2              |
| 10          | 76  | M      | Squamous cell carcinoma                | II    | T2N1M0      | Malignant  | Moderate: 2              |
| 11          | 50  | M      | Squamous cell carcinoma                | III   | T2N0M0      | Malignant  | Strong: 3                |
| 12          | 53  | F      | Squamous cell carcinoma                | III   | T2N1M0      | Malignant  | Strong: 3                |
| 13          | 74  | M      | Squamous cell carcinoma                | III   | T2N0M0      | Malignant  | Moderate: 2              |
| 14          | 53  | F      | Squamous cell carcinoma                | III   | T2N1M0      | Malignant  | Moderate: 2              |
| 15          | 72  | M      | Squamous cell carcinoma                | III   | T2N1M0      | Malignant  | Moderate: 2              |
| 16          | 65  | M      | Squamous cell carcinoma                | III   | T2N1M0      | Malignant  | Strong: 2                |
| 17          | 50  | M      | Adenocarcinoma                         | I     | T2N1M0      | Malignant  | Moderate: 2              |
| 18          | 49  | F      | Adenocarcinoma                         | I-II  | T2N1M0      | Malignant  | Moderate: 2              |
| 19          | 65  | F      | Adenocarcinoma                         | I     | T2N0M0      | Malignant  | Moderate: 2              |
| 20          | 55  | F      | Adenocarcinoma                         | II    | T2N0M0      | Malignant  | Strong: 3                |
| 21          | 63  | M      | Adenocarcinoma                         | II    | T2N2M0      | Malignant  | Strong: 3                |
| 22          | 46  | F      | Adenocarcinoma                         | II    | T3N0M0      | Malignant  | Strong: 3                |
| 23          | 41  | F      | Adenocarcinoma                         | II    | T2N0M0      | Malignant  | Strong: 3                |
| 24          | 61  | F      | Metastatic adenocarcinoma              |       |             | Metastasis | Moderate: 2              |
| 25          | 55  | F      | Adenocarcinoma                         | III   | T2N0M0      | Malignant  | Moderate: 2              |
| 26          | 51  | M      | Adenocarcinoma                         | III   | T2N0M0      | Malignant  | Moderate: 2              |
| 27          | 59  | M      | Adenocarcinoma                         | III   | T2N0M0      | Malignant  | Strong: 3                |
| 28          | 52  | M      | Adenocarcinoma                         | III   | T2N0M0      | Malignant  | Moderate: 2              |
| 29          | 38  | M      | Adenosquamous carcinoma                |       | T2N1M0      | Malignant  | Weak: 1                  |
| 30          | 76  | M      | Adenosquamous carcinoma                |       | T2N0M0      | Malignant  | Moderate: 2              |
| 31          | 38  | M      | Adenosquamous carcinoma                |       | T2N0M0      | Malignant  | Strong: 3                |
| 32          | 30  | M      | Small cell carcinoma                   |       | T4N2M0      | Malignant  | Strong: 3                |
| 33          | 1.5 | M      | Small cell carcinoma                   |       | T2N0M0      | Malignant  | Strong: 3                |
| 34          | 52  | M      | Small cell carcinoma                   |       | T2N1M0      | Malignant  | Strong: 3                |
| 35          | 56  | M      | Bronchioloalveolar carcinoma           |       | T2N0M0      | Malignant  | Strong: 3                |
| 36          | 56  | M      | Undifferentiated carcinoma, large cell |       | T2N0M0      | Malignant  | Moderate: 2              |
| 37          | 49  | M      | Papillary adenocarcinoma               |       | T2N0M0      | Malignant  | Strong: 3                |
| 38          | 57  | M      | Papillary adenocarcinoma               |       | T2N1M0      | Malignant  | Strong: 3                |
| 39          | 40  | F      | Papillary adenocarcinoma               |       | T2N0M0      | Malignant  | Strong: 3                |
| 40          | 61  | M      | Papillary adenocarcinoma               |       | T4N1M0      | Malignant  | Strong: 3                |

\*All tissue samples were purchased from BioChain

Negative: 0  
 Weak: 1  
 Moderate: 2  
 Strong: 3

**Supplementary Table S3 | Clinicopathologic characteristics of liver tissues on the tissue microarray\***

| Case number | Age  | Gender | Histology                | Grade  | Stage (TNM) | Anatomic site | Reactivity (Nu, density) |
|-------------|------|--------|--------------------------|--------|-------------|---------------|--------------------------|
| 1           | 52   | M      | Normal                   |        |             | Liver         | Weak: 1                  |
| 2           | 42   | M      | Normal                   |        |             | Liver         | Weak: 1                  |
| 3           | 35   | F      | Hepatocellular carcinoma | III    | T3N0M0      | Liver         | Weak: 1                  |
| 4           | 57   | M      | Hepatocellular carcinoma | III    | T3N0M0      | Liver         | Moderate: 2              |
| 5           | 47   | M      | Hepatocellular carcinoma | III    | T3N0M0      | Liver         | Negative: 0              |
| 6           | 31   | F      | Hepatocellular carcinoma | II~III | T3N0M0      | Liver         | Moderate: 2              |
| 7           | 49   | M      | Hepatocellular carcinoma | II~III | T3N0M0      | Liver         | Strong: 3                |
| 8           | 54   | M      | Hepatocellular carcinoma | III    | T4N1M0      | Liver         | Moderate: 2              |
| 9           | 33   | M      | Hepatocellular carcinoma | II~III | T3N0M0      | Liver         | Moderate: 2              |
| 10          | 40   | M      | Hepatocellular carcinoma | I~II   | T3N0M0      | Liver         | Weak: 1                  |
| 11          | 55   | F      | Hepatocellular carcinoma | II     | T3N0M0      | Liver         | Weak: 1                  |
| 12          | 50   | M      | Hepatocellular carcinoma | II-III | T3N0M0      | Liver         | Weak: 1                  |
| 13          | 47   | M      | Hepatocellular carcinoma | II-III | T3N0M0      | Liver         | Weak: 1                  |
| 14          | 79   | M      | Hepatocellular carcinoma | II-III | T3N0M0      | Liver         | Weak: 1                  |
| 15          | 44   | M      | Hepatocellular carcinoma | II-III | T3N0M0      | Liver         | Weak: 1                  |
| 16          | 45   | M      | Hepatocellular carcinoma | III    | T3N0M0      | Liver         | Weak: 1                  |
| 17          | 48   | M      | Clear cell carcinoma     | III    | T3N0M0      | Liver         | Moderate: 2              |
| 18          | 59   | M      | Hepatocellular carcinoma | II-III | T4N0M0      | Liver         | Weak: 1                  |
| 19          | 35   | F      | Hepatocellular carcinoma | II     | T3N0M0      | Liver         | Moderate: 2              |
| 20          | 42   | M      | Hepatocellular carcinoma | II     | T3N0M0      | Liver         | Negative                 |
| 21          | 57   | F      | Hepatocellular carcinoma | II-III | T4N1M1      | Liver         | Weak: 1                  |
| 22          | 61   | M      | Hepatocellular carcinoma | II-III | T4N0M0      | Liver         | Weak: 1                  |
| 23          | 44   | M      | Hepatocellular carcinoma | II     | T3N0M0      | Liver         | Moderate: 2              |
| 24          | 37   | F      | Hepatocellular carcinoma | II     | T4N0M0      | Liver         | Moderate: 2              |
| 25          | 35   | M      | Hepatocellular carcinoma | II     | T3N0M0      | Liver         | Weak: 1                  |
| 26          | 35   | M      | Hepatocellular carcinoma | II     | T3N0M0      | Liver         | Moderate: 2              |
| 27          | 43   | M      | Hepatocellular carcinoma | II     | T2N0M0      | Liver         | Weak: 1                  |
| 28          | 0.38 | M      | Hepatocellular carcinoma | II     | T2N0M0      | Liver         | Weak: 1                  |
| 29          | 30   | F      | Hepatocellular carcinoma | II     | T2N0M0      | Liver         | Moderate: 2              |
| 30          | 36   | M      | Hepatocellular carcinoma | I-II   | T3N0M0      | Liver         | Moderate: 2              |
| 31          | 39   | M      | Hepatocellular carcinoma | I      | T2N0M0      | Liver         | Weak: 1                  |
| 32          | 77   | M      | Hepatocellular carcinoma | I-II   | T2N0M0      | Liver         | Moderate: 2              |
| 33          | 29   | M      | Hepatocellular carcinoma | I-II   | T2N0M0      | Liver         | Moderate: 2              |
| 34          | 77   | F      | Hepatocellular carcinoma | II-III | T2N0M0      | Liver         | Weak: 1                  |
| 35          | 60   | F      | Leiomyosarcoma?          |        |             | Liver         | Moderate: 2              |
| 36          | 41   | M      | Hepatocellular carcinoma | II-III | T2N0M0      | Liver         | Moderate: 2              |
| 37          | 39   | F      | Clear cell carcinoma     | II     | T2N0M0      | Liver         | Moderate: 2              |
| 38          | 38   | F      | Hepatocellular carcinoma | II-III | T2N0M0      | Liver         | Moderate: 2              |
| 39          | 69   | F      | Hepatocellular carcinoma | II     | T3N0M0      | Liver         | Moderate: 2              |

\*All tissue samples were purchased from BioChain

Negative: 0  
Weak: 1  
Moderate: 2

Strong: 3

**Supplementary Table S3 | (Continued) Clinicopathologic characteristics of liver tissues on the tissue microarray\***

| Case number | Age | Gender | Histology                | Grade  | Stage (TNM) | Anatomic site | Reactivity (Nu, density) |
|-------------|-----|--------|--------------------------|--------|-------------|---------------|--------------------------|
| 40          | 38  | M      | Hepatocellular carcinoma | II     | T3N0M0      | Liver         | Weak: 1                  |
| 41          | 76  | M      | Hepatocellular carcinoma | II     | T3N0M0      | Liver         | Negative: 0              |
| 42          | 38  | M      | Hepatocellular carcinoma | I-II   | T3N0M0      | Liver         | Weak: 1                  |
| 43          | 30  | M      | Bile duct carcinoma      | II     | T2N0M0      | Liver         | Moderate: 2              |
| 44          | 1.5 | M      | Hepatoblastoma           |        |             | Liver         | Weak: 1                  |
| 45          | 52  | M      | Hepatocellular carcinoma | I-II   | T3N0M0      | Liver         | Weak: 1                  |
| 46          | 56  | M      | Hepatocellular carcinoma | II     | T4N0M0      | Liver         | Weak: 1                  |
| 47          | 56  | M      | Hepatocellular carcinoma | II     | T4N1M0      | Liver         | Weak: 1                  |
| 48          | 49  | M      | Hepatocellular carcinoma | II     | T4N0M0      | Liver         | Moderate: 2              |
| 49          | 57  | M      | Hepatocellular carcinoma | II-III | T4N1M0      | Liver         | Moderate: 2              |
| 50          | 40  | F      | Leiomyosarcoma?          | II     | T2N0M0      | Liver         | Weak: 1                  |
| 51          | 61  | M      | Hepatocellular carcinoma | II-III | T4N1M1      | Liver         | Moderate: 2              |
| 52          | 73  | F      | Clear cell carcinoma     | II     | T3N0M0      | Liver         | Negative: 0              |
| 53          | 41  | M      | Hepatocellular carcinoma | II     | T2N0M0      | Liver         | Weak: 1                  |
| 54          | 58  | F      | Hepatocellular carcinoma | III    | T2N0M0      | Liver         | Moderate: 2              |
| 55          | 43  | F      | Hepatocellular carcinoma | II     | T2N0M0      | Liver         | Weak: 1                  |
| 56          | 67  | F      | Hepatocellular carcinoma | II     | T2N0M0      | Liver         | Negative: 0              |
| 57          | 50  | M      | Hepatocellular carcinoma | I      | T2N0M0      | Liver         | Weak: 1                  |
| 58          | 52  | M      | Hepatocellular carcinoma | II     | T2N0M0      | Liver         | Weak: 1                  |
| 59          | 54  | M      | Hepatocellular carcinoma | II     | T2N0M0      | Liver         | Weak: 1                  |
| 60          | 40  | F      | Hepatocellular carcinoma | II     | T2N0M0      | Liver         | Weak: 1                  |
| 61          | 81  | M      | Hepatocellular carcinoma | II     | T3N0M0      | Liver         | Weak: 1                  |
| 62          | 64  | M      | Hepatocellular carcinoma | II     | T2N0M0      | Liver         | Weak: 1                  |
| 63          | 82  | M      | Hepatocellular carcinoma | II     | T2N0M0      | Liver         | Weak: 1                  |
| 64          | 43  | F      | Hepatocellular carcinoma | II     | T2N0M0      | Liver         | Moderate: 2              |
| 65          | 79  | F      | Hepatocellular carcinoma | I      | T2N0M0      | Liver         | Moderate: 2              |
| 66          | 73  | M      | Hepatocellular carcinoma | II     | T2N0M0      | Liver         | Moderate: 2              |
| 67          | 62  | M      | Hepatocellular carcinoma | II     | T2N0M0      | Liver         | Moderate: 2              |
| 68          | 69  | F      | Fibrosarcoma?            |        |             | Liver         | Moderate: 2              |
| 69          | 56  | F      | Hepatocellular carcinoma | II     | T3N0M0      | Liver         | Moderate: 2              |

Negative: 0  
 Weak: 1  
 Moderate: 2  
 Strong: 3



**Supplementary Table S4 | Association between dimethylated HSP70-status in NSCLC and patients' characteristics (n = 409)**

|                          | <b>Total<br/>(n = 409)</b> | <b>HSP70me2<br/>+2<br/>(n = 170)</b> | <b>HSP70me2<br/>+1<br/>(n = 184)</b> | <b>HSP70me2<br/>0<br/>(n = 55)</b> | <b>P value<br/>(+2 vs 0 or +1)</b> |
|--------------------------|----------------------------|--------------------------------------|--------------------------------------|------------------------------------|------------------------------------|
| <b>Gender</b>            |                            |                                      |                                      |                                    |                                    |
| Male                     | 286                        | 128                                  | 122                                  | 36                                 | 0.0215*                            |
| Female                   | 123                        | 42                                   | 62                                   | 19                                 |                                    |
| <b>Age (years)</b>       |                            |                                      |                                      |                                    |                                    |
| □65                      | 201                        | 88                                   | 89                                   | 24                                 | NS (0.5481)                        |
| □65                      | 208                        | 82                                   | 95                                   | 31                                 |                                    |
| <b>Histological type</b> |                            |                                      |                                      |                                    |                                    |
| ADC                      | 259                        | 95                                   | 123                                  | 41                                 | 0.0093***                          |
| SCC                      | 103                        | 57                                   | 40                                   | 6                                  |                                    |
| Others                   | 47                         | 18                                   | 21                                   | 8                                  |                                    |
| <b>pT factor</b>         |                            |                                      |                                      |                                    |                                    |
| pT1                      | 136                        | 49                                   | 63                                   | 24                                 | NS<br>(0.1374***)                  |
| pT2                      | 146                        | 65                                   | 68                                   | 13                                 |                                    |
| pT3                      | 43                         | 20                                   | 16                                   | 7                                  |                                    |
| pT4                      | 84                         | 36                                   | 37                                   | 11                                 |                                    |
| <b>pN factor</b>         |                            |                                      |                                      |                                    |                                    |
| N0                       | 253                        | 98                                   | 121                                  | 34                                 | NS<br>(0.3021****)                 |
| N1                       | 49                         | 18                                   | 21                                   | 10                                 |                                    |
| N2                       | 107                        | 54                                   | 42                                   | 11                                 |                                    |

Others, large-cell carcinoma (LCC) plus adenosquamous-cell carcinoma (ASC).

\**P* □ 0.05 (Fisher's exact test).

\*\*ADC versus non-ADC.

\*\*\*T1 versus T2/T3/T4.

\*\*\*\*N0 versus N1/N2.

Abbreviation: ADC, adenocarcinoma; SCC, squamous-cell carcinoma; NS, not significant.

**Supplementary Table S5 | List of proteins we have been examined to identify K561 methylation-dependent binding partners of HSP70**

| <b>Gene Symbol</b> | <b>Gene Description</b>                                      |
|--------------------|--------------------------------------------------------------|
| AURKA              | Aurora A kinase                                              |
| AURKB              | Aurora B kinase                                              |
| DNMT1              | DNA (cytosine-5)-methyltransferase 1                         |
| POLD1              | Polymerase (DNA directed), delta 1, catalytic subunit 125kDa |
| UHRF1              | Ubiquitin-like with PHD and ring finger domains 1            |
| HDAC1              | Histone deacetylase 1                                        |
| HDAC2              | Histone deacetylase 2                                        |
| RCOR1              | REST corepressor 1                                           |
| NCOR1              | Nuclear receptor corepressor 1                               |
| BIRC5              | Baculoviral IAP repeat containing 5                          |
| SIN3A              | SIN3 transcription regulator homolog A (yeast)               |
| CBX1               | Chromobox homolog 1                                          |
| NCL                | Nucleolin                                                    |
| NPM1               | Nucleophosmin (nucleolar phosphoprotein B23, numatrin)       |
| MCM7               | Minichromosome maintenance complex component 7               |
| MCM2               | Minichromosome maintenance complex component 2               |
| MCM10              | Minichromosome maintenance complex component 10              |
| PCNA               | Proliferating cell nuclear antigen                           |
| Rad51              | RAD51 homolog                                                |

**Supplementary Table S6 | Characteristics of bladder tissue samples\***

| <b>Patient ID</b> | <b>Age/Gender</b> | <b>Histology</b> | <b>Grade</b> | <b>Stage (TNM)</b> |
|-------------------|-------------------|------------------|--------------|--------------------|
| Case 1            | 49/F              | TCC              | I            | T1N0M0             |
| Case 2            | 64/M              | TCC              | III          | T3N2M1             |
| Case 3            | 51/M              | TCC              | I            | T1N0M0             |
| Case 4            | 50/M              | ADC              | III          | T2N0M0             |
| Case 5            | 52/M              | TCC              | II           | T1N0M0             |
|                   | 71/M              | Normal           |              |                    |

\*All tissue samples were purchased from BioChain.

Abbreviation: TCC, transitional cell carcinoma; ADC, adenocarcinoma

**Supplementary Table S7 | Characteristics of lung tissue samples\***

| <b>Patient ID</b> | <b>Age/Gender</b> | <b>Histology</b> | <b>Tumor size (cm)</b> | <b>Differentiation</b> | <b>Stage (TNM)</b> |
|-------------------|-------------------|------------------|------------------------|------------------------|--------------------|
| Case 1            | 65/F              | SCC              | 2.5 (diameter)         | Poorly                 | T1N0M0             |
| Case 2            | 68/F              | SCC              | 3 x 5                  | Moderately             | T2N0M0             |
| Case 3            | 58/M              | SCC              | 3 x 2                  | Moderately             | T2N1M0             |
| Case 4            | N/A               | ADC              |                        |                        | T0NxMx             |
| Case 5            | 52/M              | ADC              | 6.5 x 6 x 1            | Moderately             | T3N0M0             |
|                   | N/A               | Normal           |                        |                        |                    |

\*All tissue samples were purchased from BioChain.

Abbreviation: SCC, squamous cell carcinoma; ADC, adenocarcinoma; N/A, no applicable

**Supplementary Table S8 | Characteristics of kidney tissue samples\***

| <b>Patient ID</b> | <b>Age/Gender</b> | <b>Histology</b>            | <b>Stage (TNM)</b> |
|-------------------|-------------------|-----------------------------|--------------------|
| Case 1            | 58/M              | Clear cell carcinoma        | T1N0M0             |
| Case 2            | 50/M              | Clear cell carcinoma        | T2N0M0             |
| Case 3            | 71/M              | Transitional cell carcinoma | T2N0M0             |

\*All tissue samples were purchased from BioChain.

**Supplementary Table S9 | siRNA sequences**

| siRNA name                    |           | Sequence                                                                 |
|-------------------------------|-----------|--------------------------------------------------------------------------|
| siEGFP (control)              |           | Sense: 5' GCAGCACGACUUCUUCAAG 3'<br>Antisense: 5' CUUGAAGAAGUCGUGCUGC 3' |
| siFFLuc (control)             |           | Sense: 5' GUGCGCUGCUGGUGCCAAC 3'<br>Antisense: 5' GUUGGCACCAGCAGCGCAC 3' |
| siNegative control (cocktail) | Target #1 | Sense: 5' AUCCGCGCGAUAGUACGUA3'<br>Antisense: 5' UACGUACUAUCGCGCGGAU 3'  |
|                               | Target #2 | Sense: 5' UUACGCGUAGCGUAAUACG 3'<br>Antisense: 5' CGUAUUACGCUACGCGUAA 3' |
|                               | Target #3 | Sense: 5' UAUUCGCGCGUAUAGCGGU 3'<br>Antisense: 5' ACCGCUAUACGCGCGAAUA 3' |
| siHSP70                       |           | Sense: 5' CCGAGAAGGACGAGUUUGA 3'<br>Antisense: 5' UCAAACUCGUCCUUCUCGG 3' |
| siSETD1A #1                   |           | Sense: 5' CUCAGAAGGUGUACCGCUA 3'<br>Antisense: 5' UAGCGGUACACCUUCUGAG 3' |
| siSETD1A #2                   |           | Sense: 5' GGAAGAAGAAGCUCCGAUU 3'<br>Antisense: 5' AAUCGGAGCUUCUUCUUC 3'  |
